# Supplementary material for: Risk of Avascular Necrosis with The Modified Dunn Procedure in SCFE Patients: A Meta-Analysis
Source: MDPI journal article supplement (doi:10.3390/children9111680), 2022-10-31
Supplement: s1 [file s1]

## Supplementary Materials

**Table S1.** Study Details.

| Author, Year                  | Number of patients | Number of cases | N Stable Loder | N Unstable Loder | Mean age in years (range) | Mean follow-up in months (range) |
|-------------------------------|--------------------|-----------------|----------------|------------------|---------------------------|----------------------------------|
| Galletta et al., 2021 [28]    | 76                 | 81              | 81             | 0                | 13.6 (9 to 17)            | 68.4 (40 to 144)                 |
| Agashe et al., 2020 [29]      | 30                 | 30              | 19             | 11               | 13.05 (11 to 15.5)        | 25.36 (13 to 60)                 |
| Passaplan et al., 2020 [30]   | 17                 | 18              | 14             | 4                | 12.9 (6.8 to 17)          | 113 (50 to 250)                  |
| Zuo et al., 2020 [31]         | 20                 | 21              | 20             | 1                | 13.2 (10 to 17)           | 31.2 (12 to 57)                  |
| Masquijo et al., 2019 [32]    | 20                 | 21              | 6              | 15               | 12 (10 to 16)             | 40.4 (12 to 84)                  |
| Novais et al., 2019 [33]      | 27                 | 27              | 0              | 27               | 12.6 (11.5 to 13.8)       | 30 (22 to 37)                    |
| Ebert et al., 2019 [34]       | 15                 | 15              | 15             | 0                | 12.9 (11.8 to 15)         | 46 (12 to 120)                   |
| Davis et al., 2019 [35]       | 44                 | 48              | 17             | 31               | 12.94 (NR)                | 32.9 (NR)                        |
| Sikora-Klak et al., 2019 [36] | 14                 | 14              | 14             | 0                | 13.1 (NR)                 | 29 (18 to 40)                    |
| Jackson et al., 2018 [37]     | 9                  | 9               | 0              | 9                | 14 (9 to 15)              | 22 (NR)                          |
| Trisolino et al., 2018 [38]   | 15                 | 15              | 15             | 0                | 13.9 (NR)                 | 44.4 (24 to 64)                  |
| Ziebarth et al., 2017 [39]    | 43                 | 43              | 38             | 5                | 13 (9 to 18)              | 144 (120 to 204)                 |
| Abdelazeem et al., 2016 [24]  | 31                 | 32              | 32             | 0                | 14.3 (10.5 to 17)         | 24.1(12 to 40)                   |
| Novais et al., 2015 [40]      | 27                 | 27              | 0              | 27               | 13 (8 to 17)              | 12 (12 to 96)                    |
| Novais et al., 2015 [41]      | 15                 | 15              | 15             | 0                | 14 (12 to 17)             | 30 (12 to 72)                    |
| Souder et al., 2014 [42]      | 17                 | 17              | 10             | 7                | 12.2 (9.3 to 16.7)        | 15.6 (8 to 33)                   |
| Upasani et al., 2014 [43]     | 43                 | 43              | 17             | 26               | 12 (9 to 17)              | 31.2 (12 to 96)                  |
| Arora et al., 2013 [44]       | 8                  | 8               | 0              | 8                | 13.1 (10 to 16)           | 20.15 (4 to 48)                  |
| Madan et al., 2013 [25]       | 28                 | 28              | 11             | 17               | 12.9 (10 to 20)           | 38.6 (24 to 84)                  |
| Sankar et al., 2013 [22]      | 27                 | 27              | 0              | 27               | 12.5 (9.7 to 16)          | 22.3 (12 to 48)                  |
| Alves et al., 2012 [45]       | 6                  | 6               | 0              | 6                | 12.5 (11 to 15)           | 20.16 (12 to 26)                 |

|                                                    |    |    |    |    |                    |                  |
|----------------------------------------------------|----|----|----|----|--------------------|------------------|
| Masse et al.,<br>2012 [20]                         | 20 | 20 | 18 | 2  | 14.3 (9 to 19)     | 24 (13 to 42)    |
| Huber et al.,<br>2011 [21]                         | 28 | 30 | 25 | 3  | 12.2 (9.4 to 16.6) | 45.6 (12 to 102) |
| Slongo et al.,<br>2010 [46]                        | 23 | 23 | 3  | 20 | 11.9 (7 to 17)     | 29.3 (23 to 62)  |
| Ziebarth et al.,<br>2009 [47]                      | 40 | 40 | 27 | 12 | 12.8 (9 to 18)     | 54.8 (12 to 101) |
| Leunig et al.,<br>2007 [13]                        | 30 | 30 | NR | NR | 13 (10 to 17)      | 55 (24 to 96)    |
| N, Number; SCFE, Slipped Capital Femoral Epiphysis |    |    |    |    |                    |                  |

**Table S2.** Outcome Metrics.

| Author, Year                | HHS Overall<br>(range or SD) | HHS Stable<br>(range or SD) | HHS Unstable<br>(range or SD) | Other Outcome<br>Metrics Points<br>(range or SD) | Other Outcome<br>Metrics   |
|-----------------------------|------------------------------|-----------------------------|-------------------------------|--------------------------------------------------|----------------------------|
| Galletta et al., 2021       | 98.8<br>(78 to 100)          | NR                          | NR                            | 1 (0 to 12)                                      | WOMAC score                |
| Agashe et al., 2020         | 81.83 (7.1)                  | NR                          | NR                            | NR                                               | NR                         |
| Passaplan et al., 2020      | 88.7<br>(52 to 100)          | 93.10                       | 73.20                         | 16.5 (14 to 18)                                  | Merle d'Aubigne            |
| Zuo et al., 2020            | 96.7 (13.4)                  | NR                          | NR                            | 95.4 (10.6)                                      | WOMAC score                |
| Masquijo et al., 2019       | 76.3<br>(40 to 100)          | NR                          | NR                            | NR                                               | NR                         |
| Novais et al., 2019         | NR                           | N/A                         | NR                            | NR                                               | NR                         |
| Ebert et al., 2019          | 85.7 (12.1)                  | 85.7 (12.1)                 | N/A                           | NR                                               | NR                         |
| Davis et al., 2019          | NR                           | NR                          | NR                            | NR                                               | NR                         |
| Sikora-Klak et al.,<br>2019 | NR                           | NR                          | N/A                           | NR                                               | NR                         |
| Jackson et al., 2018        | NR                           | N/A                         | NR                            | NR                                               | NR                         |
| Trisolino et al., 2018      | NR                           | NR                          | N/A                           | 85 (74-97)                                       | Non Arthritic Hip<br>Score |
| Ziebarth et al., 2017       | NR                           | NR                          | NR                            | 17 (14 to 18)                                    | Merle d'Aubigne            |
| Abdelazeem et al.,<br>2016  | 96.3 (13.2)                  | 96.3 (13.2)                 | N/A                           | 12.1 (11 to 14)                                  | Merle d'Aubigne            |
| Novais et al., 2015         | NR                           | NA                          | NR                            | NR                                               | NR                         |
| Novais et al., 2015         | NR                           | NR                          | N/A                           | NR                                               | NR                         |

|                                                                                                 |             |       |       |                                              |                 |
|-------------------------------------------------------------------------------------------------|-------------|-------|-------|----------------------------------------------|-----------------|
| Souder et al., 2014                                                                             | NR          | NR    | NR    | NR                                           | NR              |
| Upasani et al., 2014                                                                            | NR          | NR    | NR    | NR                                           | NR              |
| Arora et al., 2013                                                                              | NR          | N/A   | NR    | 16.8 (12 to 18)                              | Merle d'Aubigne |
| Madan et al., 2013                                                                              | 89.1 (9)    | 90.30 | 88.20 | N/A                                          | N/A             |
| Sankar et al., 2013                                                                             | 88.7 (16.4) | N/A   | 96.70 | 9.3 in non-AVN,<br>5.9 in AVN                | UCLA score      |
| Alves et al., 2012                                                                              | NR          | N/A   | NR    | NR                                           | N/A             |
| Masse et al., 2012                                                                              | 98.2 (3.2)  | 98.56 | 95.00 | Pain 0.6 (0 to 4),<br>Function 2.2 (0 to 12) | WOMAC score     |
| Huber et al., 2011                                                                              | 97.8 (8.2)  | 97.69 | 98.33 | Pain 5.9 (NR),<br>Function 5.7 (NR)          | WOMAC score     |
| Slongo et al., 2010                                                                             | 99 (4.04)   | NR    | NR    | 17 (1.6)                                     | Merle d'Aubigne |
| Ziebarth et al., 2009                                                                           | NR          | NR    | NR    | NR                                           | NR              |
| Leunig et al., 2007                                                                             | NR          | NR    | NR    | NR                                           | NR              |
| N, Number; SD, Standard Deviation; NR, Not Reported; N/A, Not Applicable; HHS, Harris Hip Score |             |       |       |                                              |                 |

**Table S3.** Revisions in Cases Which did Not Develop AVN.

| Author, Year           | Revisions in Non-AVN cases | N of Non-AVN SCFE cases | Rate of Revisions in Non-AVN SCFE cases | Specific Details of Revision                                                                                                                                                                                                                                    |
|------------------------|----------------------------|-------------------------|-----------------------------------------|-----------------------------------------------------------------------------------------------------------------------------------------------------------------------------------------------------------------------------------------------------------------|
| Galletta et al., 2021  | 7                          | 65                      | 10.8%                                   | 1 case of HO, 2 cases for fixation failure, 1 with femoral neck non-union, 3 with ROH for hardware intolerance                                                                                                                                                  |
| Agashe et al., 2020    | 1                          | 28                      | 3.6%                                    | One patient with hip subluxation, requiring open reduction                                                                                                                                                                                                      |
| Passaplan et al., 2020 | 4                          | 16                      | 25.0%                                   | 6 non-AVN related revision surgeries in 4 total patients. One patients required ROH, 1 patient required offset correction followed by ROH, 1 patient required arthroscopic offset correction, 1 required removal of hardware followed by open offset correction |
| Zuo et al., 2020       | 1                          | 21                      | 4.8%                                    | One early implant failure leading to conversion to PAO                                                                                                                                                                                                          |
| Masquijo et al., 2019  | NR                         | NR                      | NR                                      | Does not differentiate between non-AVN and AVN related revisions. 10 total revision procedures in 21 total patients.                                                                                                                                            |
| Novais et al., 2019    | NR                         | NR                      | NR                                      | Seven of 27 total patients had unplanned procedures however does not differentiate if these cases of AVN of non-AVN related revisions                                                                                                                           |

|                                                                                               |    |    |        |                                                                                                                                                    |
|-----------------------------------------------------------------------------------------------|----|----|--------|----------------------------------------------------------------------------------------------------------------------------------------------------|
| Ebert et al., 2019                                                                            | 2  | 11 | 18.2%  | One patient with LLD requiring correction, one open reduction and loose body removal for hip instability                                           |
| Davis et al., 2019                                                                            | 3  | 10 | 30.0%  | Post-operative hip subluxation or dislocation requiring revision                                                                                   |
| Sikora-Klak et al., 2019                                                                      | 1  | 10 | 10.0%  | 1 case of LLD requiring revision                                                                                                                   |
| Jackson et al., 2018                                                                          | NR | 7  | NR     | None                                                                                                                                               |
| Trisolino et al., 2018                                                                        | NR | NR | NR     | None                                                                                                                                               |
| Ziebarth et al., 2017                                                                         | 14 | 43 | 32.6%  | 9 hips underwent screw removal, four hips underwent offset correction, two with open acetabular rim trimming and offset correction                 |
| Abdelazeem et al., 2016                                                                       | 1  | 31 | 3.2%   | one hip developed deep infection with AVN and ultimately required hip fusion, one hip developed completed head collapse and required screw removal |
| Novais et al., 2015                                                                           | NR | NR | NR     | None                                                                                                                                               |
| Novais et al., 2015                                                                           | 1  | 14 | 7.1%   | 1 removal of intra-articular penetrating pin, 1 revision of fixation due to implant failure, and then THA for treatment of osteonecrosis           |
| Souder et al., 2014                                                                           | NR | 13 | NR     | None                                                                                                                                               |
| Upasani et al., 2014                                                                          | NR | 33 | NR     | 15 revision procedures for femoral head AVN, fixation failure, or postoperative dislocation.                                                       |
| Arora et al., 2013                                                                            | NR | 6  | NR     | None                                                                                                                                               |
| Madan et al., 2013                                                                            | 0  | 24 | 0.0%%  | None                                                                                                                                               |
| Sankar et al., 2013                                                                           | 3  | 20 | 15.0%  | 4 broken implant revisions, 3 successful. 3 revisions successful, 1 developed AVN due to noncompliance with weight-bearing restrictions.           |
| Alves et al., 2012                                                                            | 2  | 2  | 100.0% | One successfully revised for K-wire fixation failure, another successfully revised for limb length discrepancy.                                    |
| Masse et al., 2012                                                                            | 1  | 20 | 5.0%   | One successful revision for intra-articular wire penetration.                                                                                      |
| Huber et al., 2011                                                                            | 4  | 29 | 13.8%  | 4 failed with cortical screw (out of 20 treated with cortical screw)                                                                               |
| Slongo et al., 2010                                                                           | NR | 22 | NR     | None                                                                                                                                               |
| Ziebarth et al., 2009                                                                         | 3  | 40 | 7.5%   | Three successful revisions at 6 to 8 weeks post-op for screw or wire fixation breakage.                                                            |
| Leunig et al., 2007                                                                           | 3  | 30 | 10.0%  | Two cases were screw fixation failures, third case was a bent full threaded wire. All three successfully revised.                                  |
| N, Number; SCFE, Slipped Capital Femoral Epiphysis; AVN, Avascular Necrosis; NR, Not Reported |    |    |        |                                                                                                                                                    |

**Table S4.** AVN in SCFE Treated with the Modified Dunn Procedure.

| Author, Year             | Overall % of AVN<br>(N/cases) | % of Stable w/AVN<br>(N/cases) | % of Unstable w/AVN<br>(N/cases) |
|--------------------------|-------------------------------|--------------------------------|----------------------------------|
| Galletta et al., 2021    | 19.8 % (16/81)                | 19.8 % (16/81)                 | N/A                              |
| Agashe et al., 2020      | 6.7% (2/30)                   | 0.0% (0/19)                    | 18.2% (2/11)                     |
| Passaplan et al., 2020   | 11.1% (2/18)                  | 14.3% (2/14)                   | 0.0% (0/4)                       |
| Zuo et al., 2020         | 0.0% (0/21)                   | 0.0% (0/20)                    | 0.0% (0/1)                       |
| Masquijo et al., 2019    | 47.6% (10/21)                 | 33.3% (2/6)                    | 53.3% (8.15)                     |
| Novais et al., 2019      | 25.9% (7/27)                  | N/A                            | 25.9% (7/27)                     |
| Ebert et al., 2019       | 26.7% (4/15)                  | 26.7% (4/15)                   | N/A                              |
| Davis et al., 2019       | 14.6% (7/48)                  | 29.4% (5/17)                   | 6.5% (2/31)                      |
| Sikora-Klak et al., 2019 | 29.0% (4/14)                  | 28.6% (4/14)                   | N/A                              |
| Jackson et al., 2018     | 22.2% (2/9)                   | N/A                            | 22.2% (2/9)                      |
| Trisolino et al., 2018   | 20.0% (3/15)                  | 20.0% (3/15)                   | N/A                              |
| Ziebarth et al., 2017    | 0.0% (0/43)                   | 0.0% (0/38)                    | 0.0% (0/5)                       |
| Abdelazeem et al., 2016  | 6.3% (2/32)                   | 6.3% (2/32)                    | N/A                              |
| Novais et al., 2015      | 25.9% (7/27)                  | N/A                            | 25.9% (7/27)                     |
| Novais et al., 2015      | 6.7% (1/15)                   | 6/7% (1/15)                    | N/A                              |
| Souder et al., 2014      | 23.5% (4/17)                  | 20.0% (2/10)                   | 28.6% (2/7)                      |
| Upasani et al., 2014     | 23.3% (10/43)                 | 17.6% (3/17)                   | 26.9% (7/26)                     |
| Arora et al., 2013       | 25.0% (2/8)                   | N/A                            | 25.0% (2/18)                     |
| Madan et al., 2013       | 14.3% (4/28)                  | 0.0% (0/11)                    | 23.5% (4/17)                     |
| Sankar et al., 2013      | 25.9% (7/27)                  | N/A                            | 25.9% (7/27)                     |
| Alves et al., 2012       | 66.7% (4/6)                   | N/A                            | 66.7% (4/6)                      |
| Masse et al., 2012       | 0.0% (0/20)                   | 0.0% (0/18)                    | 0.0% (0/2)                       |
| Huber et al., 2011       | 3.3% (1/30)                   | 4.0% (1/25)                    | 0.0% (0/3)                       |

|                                                                                                                    |             |             |             |
|--------------------------------------------------------------------------------------------------------------------|-------------|-------------|-------------|
| Slongo et al., 2010                                                                                                | 4.3% (1/23) | 33.3% (1/3) | 0.0% (0/20) |
| Ziebarth et al., 2009                                                                                              | 0.0% (0/40) | 0.0% (0/27) | 0.0% (0/12) |
| Leunig et al., 2007                                                                                                | 0.0% (0/30) | NR          | NR          |
| N, Number; SCFE, Slipped Capital Femoral Epiphysis; AVN, Avascular Necrosis; N/A, Not Applicable; NR, Not Reported |             |             |             |
